# Supplementary material for: Expanding the CRISPR/Cas9 toolkit for Pichia pastoris with efficient donor integration and alternative resistance markers
Source: PubMed Central journal article supplement (PMC5887973; doi:10.1002/jcb.26474), 2017-12-26
Supplement: JCB-119-3183-s002.pdf [file JCB-119-3183-s002.pdf]

## Supplementary materials

### Expanding the CRISPR-Cas9 toolkit for *Pichia pastoris* with efficient donor integration and alternative resistance makers

|                                                                                                         |   |
|---------------------------------------------------------------------------------------------------------|---|
| S1: Primers and gBlocks .....                                                                           | 2 |
| S2: Plasmids .....                                                                                      | 5 |
| S3: Sequencing of the <i>GUT1</i> locus upon CRISPR/Cas9 cleavage in <i>P. pastoris</i> $\Delta ku70$ . | 6 |

## **S1: Primers and gBlocks**

Primers and gBlocks used in this study are listed here. The generation of some plasmids has previously been described in: Weninger *et al.*, (2016) "Combinatorial optimization of CRISPR/Cas9 expression enables precision genome engineering in the methylotrophic yeast *Pichia pastoris*", *Journal of Biotechnology*, 235:139-149.

| <b>Primer name</b>                                            | <b>Sequence 5' --&gt; 3'</b>                                                                                                                                                                                                                                                         |
|---------------------------------------------------------------|--------------------------------------------------------------------------------------------------------------------------------------------------------------------------------------------------------------------------------------------------------------------------------------|
| <b>Primers for the amplification of the <i>GUT1</i> locus</b> |                                                                                                                                                                                                                                                                                      |
| GUTout3prR1                                                   | ATGAAGTTAGTAAGGTTCTTGATGAAGC                                                                                                                                                                                                                                                         |
| PGUTseq2                                                      | GGTACTTTGCCGACTCCTC                                                                                                                                                                                                                                                                  |
| 5prGUT1_fwd                                                   | tgggttcaatggcgtttgagttag                                                                                                                                                                                                                                                             |
| GUT1-3-fw                                                     | GAAAAGGTTTACTATCCCGATTTAGGCGAAAAGAG                                                                                                                                                                                                                                                  |
| GUT1-438-seq-fw                                               | Cttcagagagcttgccgtagaagaacg                                                                                                                                                                                                                                                          |
| GUT1-525-seq-rv                                               | Gttggaatcccagtaaggggcaaacaatcctg                                                                                                                                                                                                                                                     |
| <b>CRISPR/Cas9 nickase constructs</b>                         |                                                                                                                                                                                                                                                                                      |
| RZ-GUT1-gRNA0-RZ                                              | CCAGTTCAAGTTACCTAAACAAATCAAATCTGTGCTGATGAGTCCGTGAGGACGAAACGAG<br>TAAGCTCGTCcacagatatatctactataaGTTTTAGAGCTAGAAATAGCAAGTTAAAATAAGGCTAG<br>TCCGTTATCAACTTGAAAAAGTGGCACCGAGTCGGTGCCTTTGGCCGGCATGGTCCCAGC<br>CTCCTCGCTGGCGCCGGCTGGGCAACATGCTTCGGCATGGCGAATGGGACTCAAGAGGA<br>TGTCAGAATGCC |
| RZ-GUT1-gRNA4-RZ                                              | CCAGTTCAAGTTACCTAAACAAATCAAAGCCTTTCTGATGAGTCCGTGAGGACGAAACGAG<br>TAAGCTCGTCaaaggcaaaggctggcttaGTTTTAGAGCTAGAAATAGCAAGTTAAAATAAGGCTA<br>GTCCGTTATCAACTTGAAAAAGTGGCACCGAGTCGGTGCCTTTGGCCGGCATGGTCCCAG<br>CCTCCTCGCTGGCGCCGGCTGGGCAACATGCTTCGGCATGGCGAATGGGACTCAAGAGG<br>ATGTCAGAATGCC  |
| DAS1TT-hsCas9-rv                                              | TAAACTGTAAAGACTTCCCGTCTCGAGTTAAACTTTTCTTTCTTTGGGTCTCCAC                                                                                                                                                                                                                              |
| HsCas9-D10A-fw                                                | TATATTAATAACTACAACAGAATTCCGAAACGATGGACAAGAAGTACTCCATTGGGCTCGCT<br>ATCGGCACAAAACAGCGTCG                                                                                                                                                                                               |
| <b>hf-HsCas9</b>                                              |                                                                                                                                                                                                                                                                                      |
| P_AOX1_syn_pUCORI<br>_Gibs_fw                                 | CTTTTGTGGCCTTTTGTCTACATGTTCTTTCTGCGGTACCC                                                                                                                                                                                                                                            |
| HsCas9_rev                                                    | CTCGATTCACGCATGAACACCAA                                                                                                                                                                                                                                                              |
| HsCas9_fw                                                     | CTTATCCACGACTTCTCGAAGTTC                                                                                                                                                                                                                                                             |
| HDV_AOX1TT_Gibs_r<br>ev                                       | CAAATGGCATTCTGACATCCTCTTGAGTCCCATTGCCCATGCCGAA                                                                                                                                                                                                                                       |

|                                                                       |                                                                                                                                                                                                                                                                                                                                                                                                                                                                                                                                                                                                                                                                                                                                                                                                                                                                                                                                                                                                                                                                                                                                                                                                                                                                                                                                                                                                                                                                                                                      |
|-----------------------------------------------------------------------|----------------------------------------------------------------------------------------------------------------------------------------------------------------------------------------------------------------------------------------------------------------------------------------------------------------------------------------------------------------------------------------------------------------------------------------------------------------------------------------------------------------------------------------------------------------------------------------------------------------------------------------------------------------------------------------------------------------------------------------------------------------------------------------------------------------------------------------------------------------------------------------------------------------------------------------------------------------------------------------------------------------------------------------------------------------------------------------------------------------------------------------------------------------------------------------------------------------------------------------------------------------------------------------------------------------------------------------------------------------------------------------------------------------------------------------------------------------------------------------------------------------------|
| gBlock_hf-HsCas9                                                      | TTGGTGTTTCATGCGTGAATCGAGAATTTGGGCCACGTGCTTGGTGATAGCGCGTGTCTCA<br>ACAAGCTGCCTTTTGTAGAACCCGGCTTTATCCAACCTCAGACAGGCCACCTCGTTACAGCCT<br>TAGTCAGATTATCGAACTTCCGTTGTGTGATCAGTTTGGCGTTCAGCAGCTGCCGCCAATA<br>ATTTTTCATTTTCTTGACAACCTTCTTGAGGGGACGTTATCACTTCCCTCTATTTTTATC<br>GGATCTTGTCAACACTTTATTATCAATAGAATCATCTTTGAGAAAAGACTGGGGCAGATAT<br>GATCCACGTCGTAGTCGAGAGCCGATTGATGTCCAGTTCCTGATCCACGTACATGTCCC<br>TGCCGTTCTGCAGGTAGTACAGGTAGAGCTTCTCATTCTGAAGCTGGGTGTTTTCAACTGG<br>GTGTTCCCTTAAGGATTTGGGACCCAGTTCCTTTATACCCTCTTCAATCCTCTTCATCCTTT<br>CCCTACTGTTCTTCTGTCCTTCTGGGTAGTTTGGTTCCTCGGGCCATCTCGATAACGAT<br>ATTCTCGGGCTTATGCCTTCCCATTACTTTGACGAGTTCATCCACGACCTTACGGTCTGC<br>AGTATTCCCTTTTTGATAGCTGGGCTACCTGCAAGATTAGCGATGTGCTCGTGAAGACTGT<br>CCCCCTGGCCAGAACTTGTGCTTCTGGATGTCCCTTAAAGGTGAGAGATCATCATG<br>GATCAAAGCCATGAAGTCCGGTTGGCAAATCCATCGACTTAAAGAAAATCCAGGATTGT<br>TTCCACTCTGCTTGTCTCGGATCCCATTGATCAGTTTTCTTGACAGAGCCCCCATCCTG<br>TATATCGGCGCCTCTTGAGCTGTTTATGACTTTGTCGTCGAAGAGATGAGCGTAAGTTTT<br>CAAGCGTCTTCAATCATCTCCCTATCTTCAAACAACGTAAGGGTGAGGACAATGCCTCA<br>AGAATGCCTCGTTCTCCTCATTGTCCAGGAAGTCTTGTCTTAAATGATTTTCAGGAGATC<br>GTGATACGTTCCAGGGATGCGTTGAAGCGATCCTCCACTCCGCTGATTTCAACAGAGTC<br>GAAACATTCAATCTTTTTGAAATAGTCTTCTTTGAGCTGTTTCACGGTAACTTTCCGGTTCG<br>TCTTGAAGAGGAGGTCCACGATAGCTTCTTCTGCTCTCCAGACAGGAATGCTGGCTTCT<br>CATCCCTTCTGTGACGATTTGACCTTGGTGAGCTCGTTATAAACTGTGAAGTACTCGTAC<br>AGCAGAGAGTGTGTTAGGAAGCACCTTTTCGTTAGGCAGATTTTTATCAAAGCAGTCATCC<br>TTTCGATGAAGGACTGGGCAGAGGCCCTTATCCACGACTTCTCGAAGTTC |
| 3UTRGUTR                                                              | GTGTTTGCTGTAGGATGACCTAGATTTAAATATAAGAGGAAACAACGTTTCGTATCGTGA                                                                                                                                                                                                                                                                                                                                                                                                                                                                                                                                                                                                                                                                                                                                                                                                                                                                                                                                                                                                                                                                                                                                                                                                                                                                                                                                                                                                                                                         |
| seq-pGUT1-332..308-<br>fwd                                            | tgggtcaatggcggttgagtag                                                                                                                                                                                                                                                                                                                                                                                                                                                                                                                                                                                                                                                                                                                                                                                                                                                                                                                                                                                                                                                                                                                                                                                                                                                                                                                                                                                                                                                                                               |
| <b>Episomal donor cassettes</b>                                       |                                                                                                                                                                                                                                                                                                                                                                                                                                                                                                                                                                                                                                                                                                                                                                                                                                                                                                                                                                                                                                                                                                                                                                                                                                                                                                                                                                                                                                                                                                                      |
| ARG4TT-ARS-fw                                                         | TCGTCTCCAGCAGCATCCTCGCATTGGTACTCGAGATAAGCTGGGGGAACATT                                                                                                                                                                                                                                                                                                                                                                                                                                                                                                                                                                                                                                                                                                                                                                                                                                                                                                                                                                                                                                                                                                                                                                                                                                                                                                                                                                                                                                                                |
| pUORI-ARS-rv                                                          | CTACGGGGTCTGACGCTCAGTG TCGACAATTAATATTTACTTATTTTGGTCAAC                                                                                                                                                                                                                                                                                                                                                                                                                                                                                                                                                                                                                                                                                                                                                                                                                                                                                                                                                                                                                                                                                                                                                                                                                                                                                                                                                                                                                                                              |
| Pjet-ARS-fw                                                           | AATAGGCGTATCACGAGGCCGCCCTGCATCGAGATAAGCTGGGGGAACATT                                                                                                                                                                                                                                                                                                                                                                                                                                                                                                                                                                                                                                                                                                                                                                                                                                                                                                                                                                                                                                                                                                                                                                                                                                                                                                                                                                                                                                                                  |
| Pjet-ARS-rv                                                           | TTATTTGGCAAAAATAATATAATTCGGCTCGACAATTAATATTTACTTATTTTGGTCAAC                                                                                                                                                                                                                                                                                                                                                                                                                                                                                                                                                                                                                                                                                                                                                                                                                                                                                                                                                                                                                                                                                                                                                                                                                                                                                                                                                                                                                                                         |
| <b>CRISPR/Cas9 constructs for DNA deletion at the DAS1/DAS2 locus</b> |                                                                                                                                                                                                                                                                                                                                                                                                                                                                                                                                                                                                                                                                                                                                                                                                                                                                                                                                                                                                                                                                                                                                                                                                                                                                                                                                                                                                                                                                                                                      |
| RZ-DAS1/2-gRNA1-RZ                                                    | CCAGTTCAAGTTACCTAAACAAATCAAACCTCACTGATGAGTCCGTGAGGACGAAACGAG<br>TAAGCTCGTCTGAGGTTACCACTGGTCCCGTTTTAGAGCTAGAAAATAGCAAGTTAAAATA<br>AGGCTAGTCCGTTATCAACTTGAAAAAGTGGCACCGAGTCGGTGCTTTTGGCCGGCATGG<br>TCCCAGCCTCCTCGCTGGCGCCGGCTGGGCAACATGCTTCGGCATGGCGAATGGGACTC<br>AAGAGGATGTCAGAATGCC                                                                                                                                                                                                                                                                                                                                                                                                                                                                                                                                                                                                                                                                                                                                                                                                                                                                                                                                                                                                                                                                                                                                                                                                                                  |
| RZ-DAS1/2-gRNA2-RZ                                                    | CCAGTTCAAGTTACCTAAACAAATCAAACCTCAACCTGATGAGTCCGTGAGGACGAAACGAG<br>TAAGCTCGTCTGTTGAGGCCATGTCGCATAGTTTTAGAGCTAGAAAATAGCAAGTTAAAATA<br>AGGCTAGTCCGTTATCAACTTGAAAAAGTGGCACCGAGTCGGTGCTTTTGGCCGGCATGG<br>TCCCAGCCTCCTCGCTGGCGCCGGCTGGGCAACATGCTTCGGCATGGCGAATGGGACTC<br>AAGAGGATGTCAGAATGCC                                                                                                                                                                                                                                                                                                                                                                                                                                                                                                                                                                                                                                                                                                                                                                                                                                                                                                                                                                                                                                                                                                                                                                                                                               |
| Das2_rev                                                              | GTCCTACAGGTAACAGATAGCCACTACG                                                                                                                                                                                                                                                                                                                                                                                                                                                                                                                                                                                                                                                                                                                                                                                                                                                                                                                                                                                                                                                                                                                                                                                                                                                                                                                                                                                                                                                                                         |
| Das1_fw                                                               | CATCAGATATTATCATCGCGCTTACG                                                                                                                                                                                                                                                                                                                                                                                                                                                                                                                                                                                                                                                                                                                                                                                                                                                                                                                                                                                                                                                                                                                                                                                                                                                                                                                                                                                                                                                                                           |
| Das2_fw                                                               | CGATACTTCTCCACATTCAGTCATAGATGG                                                                                                                                                                                                                                                                                                                                                                                                                                                                                                                                                                                                                                                                                                                                                                                                                                                                                                                                                                                                                                                                                                                                                                                                                                                                                                                                                                                                                                                                                       |
| Das1_rev                                                              | CCTCAGGTCTCGGTTAGCCTCTAGG                                                                                                                                                                                                                                                                                                                                                                                                                                                                                                                                                                                                                                                                                                                                                                                                                                                                                                                                                                                                                                                                                                                                                                                                                                                                                                                                                                                                                                                                                            |
| <b>CRISPR/Cas9 plasmid bearing the Geneticin resistance cassette</b>  |                                                                                                                                                                                                                                                                                                                                                                                                                                                                                                                                                                                                                                                                                                                                                                                                                                                                                                                                                                                                                                                                                                                                                                                                                                                                                                                                                                                                                                                                                                                      |
| RZ-GUT1-gRNA1-RZ                                                      | CCAGTTCAAGTTACCTAAACAAATCAAATACTCGCTGATGAGTCCGTGAGGACGAAACGAG<br>TAAGCTCGTCCGAGTACTCTACCTCTGCTCGTTTTAGAGCTAGAAAATAGCAAGTTAAAATA<br>GGCTAGTCCGTTATCAACTTGAAAAAGTGGCACCGAGTCGGTGCTTTTGGCCGGCATGG<br>CCCAGCCTCCTCGCTGGCGCCGGCTGGGCAACATGCTTCGGCATGGCGAATGGGACTCA<br>AGAGGATGTCAGAATGCC                                                                                                                                                                                                                                                                                                                                                                                                                                                                                                                                                                                                                                                                                                                                                                                                                                                                                                                                                                                                                                                                                                                                                                                                                                  |
| RZ-GUT1-gRNA2-RZ                                                      | CCAGTTCAAGTTACCTAAACAAATCAAATTGCACTGATGAGTCCGTGAGGACGAAACGAG<br>TAAGCTCGTCTGCAATTTCTCAGCCAGGCGTTTTAGAGCTAGAAAATAGCAAGTTAAAATA<br>AGGCTAGTCCGTTATCAACTTGAAAAAGTGGCACCGAGTCGGTGCTTTTGGCCGGCATGG<br>TCCCAGCCTCCTCGCTGGCGCCGGCTGGGCAACATGCTTCGGCATGGCGAATGGGACTC<br>AAGAGGATGTCAGAATGCC                                                                                                                                                                                                                                                                                                                                                                                                                                                                                                                                                                                                                                                                                                                                                                                                                                                                                                                                                                                                                                                                                                                                                                                                                                  |

|                                 |                                                                                                                                                                                                                                                                                                                                                                                                                                                  |
|---------------------------------|--------------------------------------------------------------------------------------------------------------------------------------------------------------------------------------------------------------------------------------------------------------------------------------------------------------------------------------------------------------------------------------------------------------------------------------------------|
| RZ-GUT1-gRNA3-RZ                | CCAGTTCAAGTTACCTAAACAAATCAAAAACAACCTGATGAGTCCGTGAGGACGAAACGAG<br>TAAGCTCGTCGTTGTTTGGTCCAAGAAGACGTTTTAGAGCTAGAAATAGCAAGTTAAAATA<br>AGGCTAGTCCGTTATCAACTTGAAAAAGTGGCACCCAGTCCGGTGCTTTTGGCCGGCATGG<br>TCCCAGCCTCCTCGCTGGCGCCGGCTGGGCAACATGCTTCGGCATGGCGAATGGGACTC<br>AAGAGGATGTCAGAATGCC                                                                                                                                                            |
| Zeocin resistance gene<br>(CDS) | ATGGCTAAACTCACCTCTGCTGTTCCAGT <b>CCTGACTGCTCGTGATGTTGCTGGT</b> GCTGTTG<br>AGTTCGGACTGATAGACTCGGTTTCTCCCGTGACTTCGTAGAGGACGACTTTGCCGGTG<br>TTGTACGTGACGACGTTACCCTGTTTCATCTCCGAGTTCAGGACCAGGTTGTGCCAGACA<br>ACACT <b>CTGGCATGGGTATGGGTTCTG</b> TGGTCTGGACGAACTGTACGCTGAGTGGTCTGAG<br>GTCGTGTCTACCAACTCCGTGATGCATCTGGTCCAGCTATGA <b>CCGAGATCGGTGAACAG</b><br><b>CCCTGGGGT</b> CGTGAGTTTGCACTGCGTGATCCAGCTGGTAACTGCGTGCAATTCGTCGCA<br>GAAGAGCAGGACTAA |
| ZEO-gRNA1                       | CCAGTTCAAGTTACCTAAACAAATCAA <b>agtcag</b> CTGATGAGTCCGTGAGGACGAAACGAG<br>TAAGCTCGT <b>CCTGACTGCTCGTGATGTTG</b> CGTTTTAGAGCTAGAAATAGCAAGTTAAAATA<br>AGGCTAGTCCGTTATCAACTTGAAAAAGTGGCACCCAGTCCGGTGCTTTTGGCCGGCATGG<br>TCCCAGCCTCCTCGCTGGCGCCGGCTGGGCAACATGCTTCGGCATGGCGAATGGGACTC<br>AAGAGGATGTCAGAATGCC                                                                                                                                           |
| ZEO-gRNA2                       | CCAGTTCAAGTTACCTAAACAAATCAA <b>agtcag</b> CTGATGAGTCCGTGAGGACGAAACGAG<br>TAAGCTCGT <b>CCTGGCATGGGTATGGGTTCTG</b> GTTTTAGAGCTAGAAATAGCAAGTTAAAATA<br>AGGCTAGTCCGTTATCAACTTGAAAAAGTGGCACCCAGTCCGGTGCTTTTGGCCGGCATGG<br>TCCCAGCCTCCTCGCTGGCGCCGGCTGGGCAACATGCTTCGGCATGGCGAATGGGACTC<br>AAGAGGATGTCAGAATGCC                                                                                                                                          |
| ZEO-gRNA3                       | CCAGTTCAAGTTACCTAAACAAATCAA <b>ctcgg</b> CTGATGAGTCCGTGAGGACGAAACGAG<br>TAAGCTCGT <b>CCGAGATCGGTGAACAGCC</b> GTTTTAGAGCTAGAAATAGCAAGTTAAAATA<br>AAGGCTAGTCCGTTATCAACTTGAAAAAGTGGCACCCAGTCCGGTGCTTTTGGCCGGCATG<br>GTCCCAGCCTCCTCGCTGGCGCCGGCTGGGCAACATGCTTCGGCATGGCGAATGGGACT<br>CAAGAGGATGTCAGAATGCC                                                                                                                                             |

## S2: Plasmids

Sequence files of the following plasmids are provided in genbank (.gb) format.

### pPpT4\_pHTX1-hf-HsCas9-GUT1-gRNA1

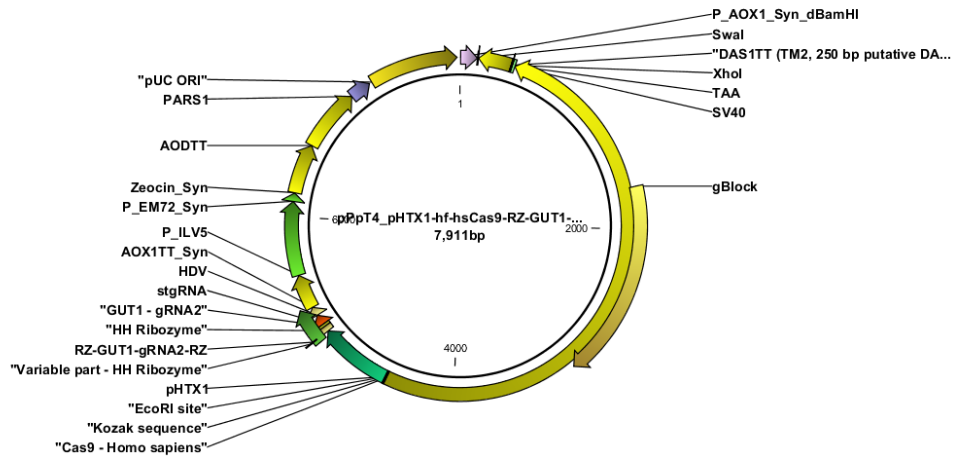

### pPpT4\_HTX1-PARS1-HsCas9-Gen

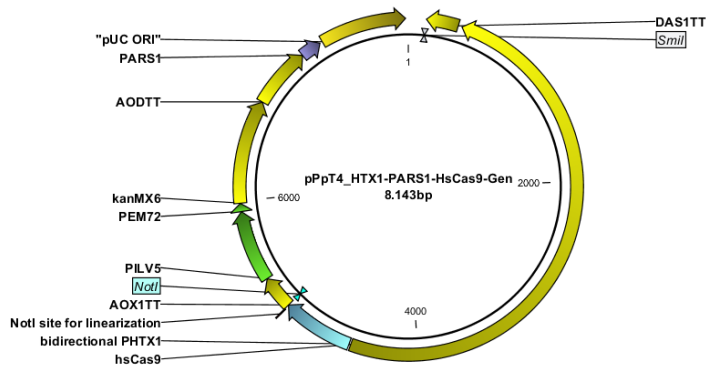

### pJet-GUT1-PARS1

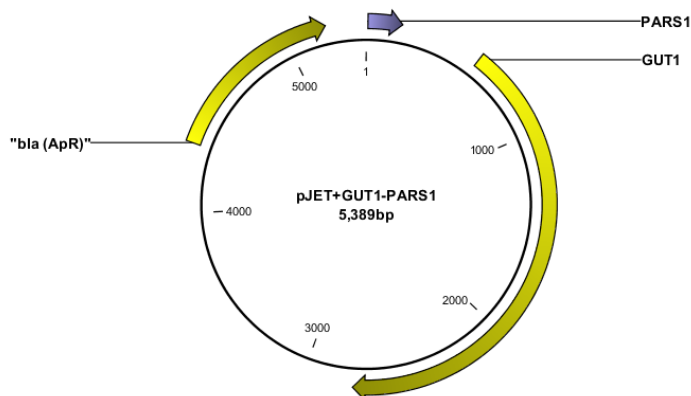

### S3: Sequencing of the *GUT1* locus upon CRISPR/Cas9 cleavage in *P. pastoris* $\Delta ku70$

When solely a CRISPR/Cas9 plasmid was transformed to target the *GUT1* gene (no donor), sequencing of *P. pastoris*  $\Delta ku70$ ,  $\Delta gut1$  CRISPR/Cas9 transformants resulted in ~600 bp deletions upstream of the Cas9 cleavage site (Figure S3B,C). Compared to the *P. pastoris*  $\Delta ku70$  transformants, *P. pastoris* wildtype  $\Delta gut1$  transformants bore short insertions or deletion mutations (indels, Weninger et al., (2016)) (Figure S3B).

The co-transformation of CRISPR/Cas9 plasmids and donor DNA, and sequencing of *P. pastoris*  $\Delta ku70$   $\Delta gut1$  transformants resulted either in the complete removal of the *GUT1* gene or sequencing reads, which could only be aligned partially, containing mixed sequences. These mixed reads may indicate chromosomal rearrangements or translocations. An example is shown in Figure S3D.

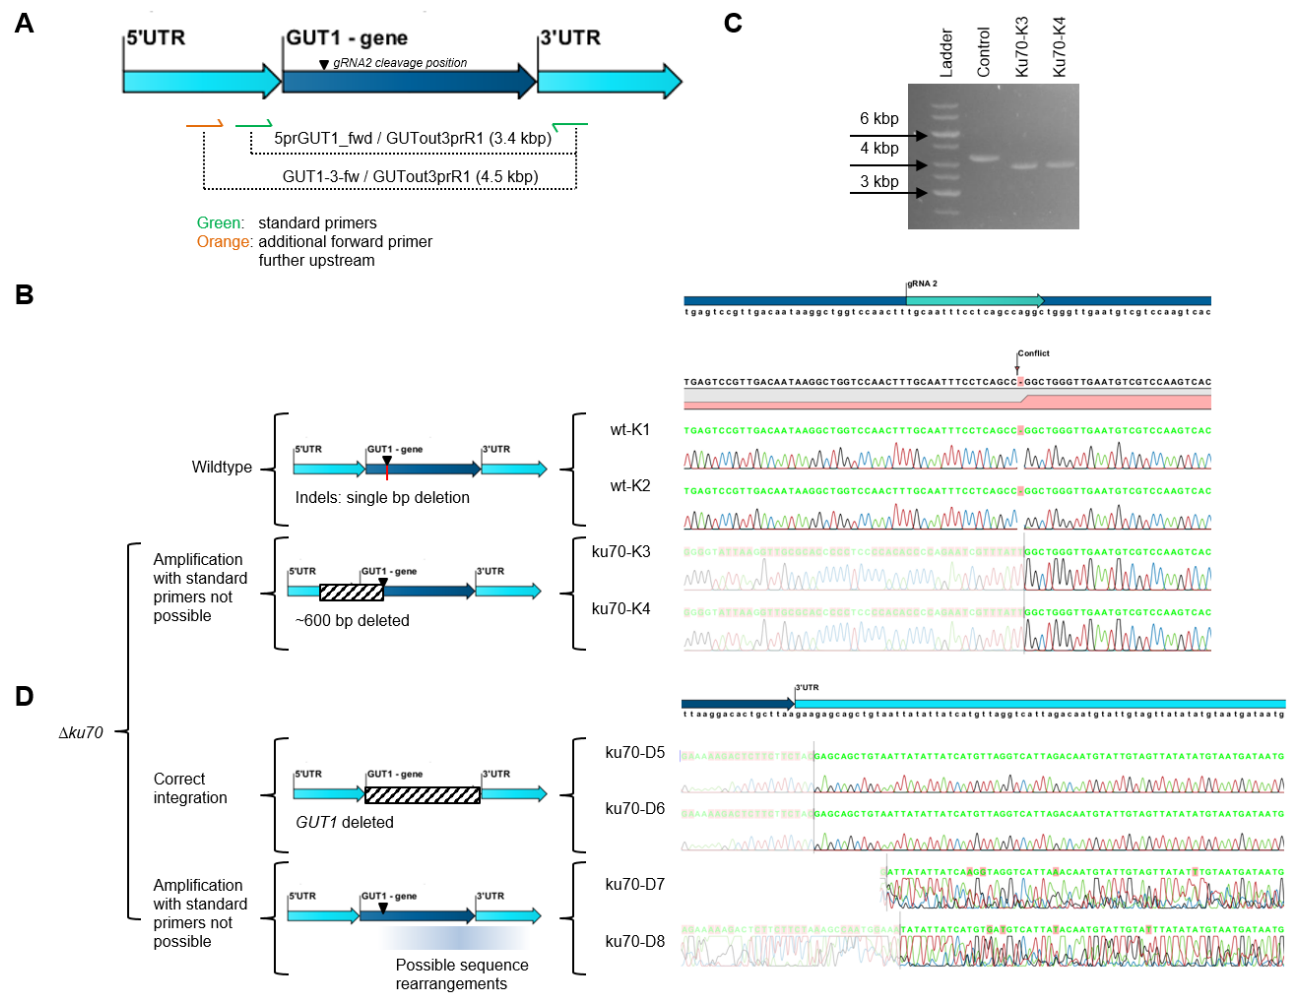

**S 3: Sequencing of the *GUT1* locus of *P. pastoris*  $\Delta ku70$  transformants.** **A.** Scheme of the *GUT1* locus and primer pairs used for PCR amplification/sequencing. **B.** Sequencing of the *GUT1* locus of *P. pastoris* wildtype and  $\Delta ku70$  transformants (transformed with CRISPR/Cas9 plasmids to target *GUT1* [without donor DNA]). NHEJ-mediated repair in *P. pastoris* wildtype resulted in short indel mutations (wt-K1 and wt-K2). *P. pastoris*  $\Delta ku70$   $\Delta gut1$  transformants ku70-K3 and ku70-K4 bore large deletion mutation (approximately 600 bp). The region upstream of the Cas9 cleavage site was deleted. **C.** Also the PCR products (primers GUT1-3-fw and GUTout3prR1) of ku70-K3 and ku70-K4 were ca. 0.6 kbp reduced in size compared to the wildtype control, in line with the deletions observed in the sequencing. **D.** Sequencing of the *GUT1* locus of *P. pastoris*  $\Delta ku70$  transformants, which were co-transformed with CRISPR/Cas9 plasmids to target *GUT1* and donor DNA. The sequence of the 3' end of *GUT1* and 3'UTR aligned to various sequencing reads is shown. ku70-D5 and ku70-D6: the integration of the donor fragment for the removal of the *GUT1* CDS was obtained; the shaded part of the sequence corresponds to the 5'UTR of *GUT1*. Ku70-D7 and ku70-D8: If no donor was integrated mixed reads were obtained, which may indicate sequential rearrangements.
